# Supplementary material
Source: publisher figshare collection journal article supplement (https://acs.figshare.com/ndownloader/files/39661266)
Supplement: Supplementary file 1 [file 39661266]

Example	SMILES	human ADRENOCEPTOR_A2B_IC50 [mol/l]
1	COc1ccccc1n2cnc3cc(NC(=O)C)ccc23	2.89E-8
2	COc1ccccc1n2cnc3cc(NC(=O)CCc4ccccn4)ccc23	5.00E-9
3	COc1ccccc1n2cnc3cc(NC(=O)CCc4cccnc4)ccc23	5.50E-8
4	COc1ccccc1n2cnc3cc(NC(=O)CCc4ccncc4)ccc23	9.70E-8
5	COc1ccccc1n2cnc3cc(NC(=O)CN(C)C)ccc23.OC=O	2.75E-8
8	CNc1cc[n+](CC(=O)Nc2ccc3c(c2)ncn3c4ccccc4OC)cc1.[O-]C=O	1.50E-8
9	CNc1cc[n+](CC(=O)Nc2ccc3c(c2)ncn3c4ccnn4C)cc1.[O-]C=O	2.90E-7
10	CCn1nccc1n2cnc3cc(NC(=O)C[n+]4ccc(NC)cc4)ccc23.[O-]C=O	3.87E-8
11	CNc1cc[n+](CC(=O)Nc2ccc3c(c2)ncn3c4c(C)nsc4C)cc1.[O-]C=O	2.05E-8
12	CNc1cc[n+](CC(=O)Nc2ccc3c(c2)ncn3c4c(C)onc4C)cc1.[O-]C=O	1.47E-8
13	Cc1onc(C)c1n2cnc3cc(N)ccc23
14	CNc1cc[n+](CC(=O)Nc2cccc(C)c2)cc1.[O-]C=O
17	CNc1cc[n+](CC(=O)Nc2cnc3c(c2)ncn3c4ccccc4OC)cc1.[O-]C=O	7.13E-8
18	CNc1cc[n+](CC(=O)Nc2cnc3c(cnn3c4ccccc4OC)c2)cc1.[O-]C=O	> 1.00E-5
19	CNc1cc[n+](CC(=O)Nc2cc3cnn(c4ccccc4OC)c3cn2)cc1.[O-]C=O	1.00E-5
20	CNc1cc[n+](CC(=O)Nc2ccc3c(cnn3c4ccccc4OC)n2)cc1.[O-]C=O	4.80E-7
21	CNc1cc[n+](C\C(=C\c2ccc3c(c2)ncn3c4c(C)onc4C)\F)cc1.[O-]C=O	2.60E-6
22	CNc1cc[n+](C[C@@H](Nc2ccc3c(c2)ncn3c4c(C)onc4C)C(F)(F)F)cc1.[O-]C=O	7.05E-6
23	CNc1cc[n+](CCNC(=O)c2ccc3c(c2)ncn3c4c(C)onc4C)cc1.[O-]C=O	5.90E-8
24	[Cl-].CNc1cc[n+](CCNC(=O)c2ccn3c(cnc3c2)c4c(C)onc4C)cc1	1.38E-8
25	CNc1cc[n+](CCNC(=O)c2ccc3c(c2)nnn3c4c(C)onc4C)cc1.[O-]C=O	1.57E-7
26	Cc1onc(C)c1c2cnc3cc(ccn23)C(=O)NCC[n+]4ccc(N)cc4.[O-]C=O	1.95E-6
27	CCNc1cc[n+](CCNC(=O)c2ccn3c(cnc3c2)c4c(C)onc4C)cc1.[O-]C=O	8.55E-8
28	CCc1cc[n+](CCNC(=O)c2ccn3c(cnc3c2)c4c(C)onc4C)cc1.[O-]C=O	9.40E-8
29	CN(C)c1cc[n+](CCNC(=O)c2ccn3c(cnc3c2)c4c(C)onc4C)cc1.[O-]C=O	9.35E-9
30	CNc1ccc[n+](CCNC(=O)c2ccn3c(cnc3c2)c4c(C)onc4C)c1.[O-]C=O	1.00E-7
31	CNc1cc[n+](CCNC(=O)c2ccn3c(cnc3c2)c4c(C)onc4C)c(C)c1.[O-]C=O	4.85E-8
32	CNc1cc[n+](CCCNC(=O)c2ccn3c(cnc3c2)c4c(C)onc4C)cc1.[O-]C=O	5.45E-7
33	CNc1cc[n+](CCNC(=O)c2ccn3c(cnc3c2)c4c(C)cnn4C)cc1.[O-]C=O	2.88E-8
34	CNc1cc[n+](CCNC(=O)c2ccn3c(cnc3c2)c4cc(C)nn4C)cc1.[O-]C=O	8.60E-6
35	CNc1cc[n+](CCNC(=O)c2ccn3c(cnc3c2)c4ccccc4OC)cc1.[O-]C=O	3.55E-9
36	CNc1cc[n+](CCNC(=O)c2ccn3c(cnc3c2)c4cccnc4OC)cc1.[O-]C=O	7.45E-9
44	Nc1ccc(CNc2ccncc2)c(F)c1
45	CNc1cc[n+](CCNC(=O)c2ccn3c(cnc3c2)c4c(C)onc4C)cc1.[O-]C=O	2.43E-8
